# Supplementary material for: Dual Response Site Fluorescent Probe for Highly Sensitive Detection of Cys/Hcy and GSH In Vivo through Two Different Emission Channels
Source: MDPI journal article supplement (doi:10.3390/bios12111056), 2022-11-21
Supplement: s1 [file s1]

*Supporting information for*

## **Dual response site fluorescent probe for highly sensitive detection of Cys/Hcy and GSH in vivo through two different emission channels**

Huiling Hou <sup>a</sup>, Qi Liu <sup>b</sup>, Xiangbao Liu <sup>c</sup>, Shuang Fu <sup>c</sup>, Hongguang Zhang <sup>c</sup>, Shuang Li <sup>c</sup>,  
Song Chen <sup>c</sup>, Peng Hou <sup>c\*</sup>

<sup>a</sup>Achievement Transformation Center, Qiqihar Medical University, Qiqihar, P. R.  
China, 161006.

<sup>b</sup>Research Institute of Medicine & Pharmacy, Qiqihar Medical University, Qiqihar, P.  
R. China, 161006.

<sup>c</sup>College of Pharmacy, Qiqihar Medical University, Qiqihar, P. R. China, 161006.

*\* Corresponding author.*

E-mail address: houpeng1982@163.com

### **Table of contents**

|                            | Page      |
|----------------------------|-----------|
| <b>Table S1.....</b>       | <b>1</b>  |
| <b>Figures S1-2.....</b>   | <b>3</b>  |
| <b>Figures S3-4.....</b>   | <b>4</b>  |
| <b>Figures S5-6.....</b>   | <b>5</b>  |
| <b>Figures S7-8.....</b>   | <b>6</b>  |
| <b>Figures S9-10.....</b>  | <b>7</b>  |
| <b>Figures S11-12.....</b> | <b>8</b>  |
| <b>Figures S13-14.....</b> | <b>9</b>  |
| <b>Figures S15-16.....</b> | <b>10</b> |
| <b>Figures S17-18.....</b> | <b>11</b> |

**Table S1.** The reported fluorescent probes based on dual-site for thiols.

| Probe                                                                               | Stokes shift                                 | Test system                   | Detection limit                                                  | Response time                          | Application                         | Literature                                          |
|-------------------------------------------------------------------------------------|----------------------------------------------|-------------------------------|------------------------------------------------------------------|----------------------------------------|-------------------------------------|-----------------------------------------------------|
| 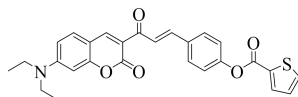   | 51nm                                         | HEPES:<br>DMSO=6:4            | Cys:0.24μM                                                       | Cys:10min                              | HeLa cells<br>BHK-21 cells          | Dyes<br>Pigments<br>2022, 197,<br>109823            |
|    | 104nm/<br>61nm                               | PBS<br>buffer                 | Cys: 132nM<br>Hcy: 105nM<br>GSH :62nM                            | Cys: 190s<br>Hcy: 155s<br>GSH: 80s     | zebrafish<br>embryos;<br>HeLa cells | Dyes<br>Pigments<br>2022, 199,<br>110058            |
|   | Cys:<br>95nm<br>Hcy:<br>92nm<br>GSH:<br>62nm | PBS:<br>DMSO=9:1              | Cys: 39.2nM<br>Hcy:<br>126.7nM<br>GSH:<br>839.5nM                | Cys: 12min<br>Hcy: 12min<br>GSH: 20min | HepG2<br>cells                      | Dyes<br>Pigments<br>2022, 203,<br>110312            |
|  | Cys:<br>96nm<br>Hcy:<br>97nm<br>GSH:<br>90nm | PBS:<br>DMSO=8:2              | Cys: 27.3nM<br>Hcy: 45.9nM<br>GSH: 13.7nM                        | -----                                  | HepG2<br>cells ;<br>zebrafish       | Chinese<br>Chem.<br>Lett.<br>2022, 33,<br>1609-1612 |
|  | 59nm                                         | PBS:<br>THF=2:3               | 6.14×10 <sup>-8</sup> M                                          | Cys: 1min<br>Hcy: 3min<br>GSH: 16min   | HeLa cells                          | Sensor<br>Actua<br>B-Chem.<br>2017, 244,<br>531-540 |
|  | Cys:<br>87nm<br>Hcy:<br>73nm                 | PBS<br>with 1.0<br>mM<br>CTAB | Cys:<br>1.5×10 <sup>-7</sup> M<br>Hcy:<br>1.1×10 <sup>-7</sup> M | 60min                                  | HeLa cells                          | Tetrahedro<br>n Lett.<br>2018, 59,<br>2232-2237     |
|  | 140nm                                        | PBS:<br>DMSO=1:1              | Cys:<br>9.1×10 <sup>-8</sup> M                                   | Cys:10min                              | U87 cells                           | Biosens.<br>Bioelectron<br>2017, 92,<br>583-588     |

|                                                                                     |                                              |                                      |                                       |                                                   |                             |                                                                            |
|-------------------------------------------------------------------------------------|----------------------------------------------|--------------------------------------|---------------------------------------|---------------------------------------------------|-----------------------------|----------------------------------------------------------------------------|
| 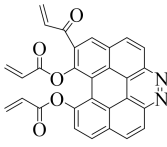   | 65nm                                         | PBS<br>buffer                        | 0.11μM                                | 5min                                              | HeLa cells                  | Sensor<br>Actua<br>B-Chem.<br>2020, 320,<br>128304                         |
|    | Hcy:<br>78nm<br>Cys:<br>80nm<br>GSH:<br>81nm | PBS:<br>DMSO=<br>7:3                 | Hcy: 3nM,<br>Cys:6nM<br>GSH: 200nM    | 15min                                             | A375 cells                  | Talanta<br>2020, 219,<br>121353                                            |
|    | 60nm                                         | PBS:<br>DMSO=<br>1:1                 | 0.3μM                                 | 7min                                              | A549 cell                   | Sensor<br>Actua<br>B-Chem .2<br>017, 253,<br>42-49<br>Dyes<br>Pigments     |
|   | 113nm                                        | HEPES:<br>DMSO=<br>9:1               | 0.8μM                                 | -----                                             | HeLa cells                  | 2017, 139,<br>73-78<br>Chinese<br>Chem.<br>Lett. 2017,<br>28,<br>2023-2026 |
|  | 76nm                                         | CH <sub>3</sub> CN:<br>HEPES=<br>1:9 | 4.63×10 <sup>-7</sup> M               | -----                                             | Hi5 cell<br>C. eleg-an<br>s |                                                                            |
|  | -----                                        | CH <sub>3</sub> CN:<br>HEPES=<br>1:1 | Hcy: 87nM<br>Cys: 147nM<br>GSH: 129nM | Cys: 6.7min<br>Hcy:<br>13.5min<br>GSH:<br>79.4min | HeLa cells                  | Dyes<br>Pigments<br>2018, 152,<br>29-35                                    |
|  | Cys/<br>Hcy/GS<br>H:<br>117 nm               | PBS:<br>DMSO=<br>8:2                 | Cys: 32nM<br>Hcy: 45nM<br>GSH :22nM   | Cys: 300s<br>Hcy: 350s<br>GSH: 350s               | HeLa cells<br>Zebrafish     | This work                                                                  |

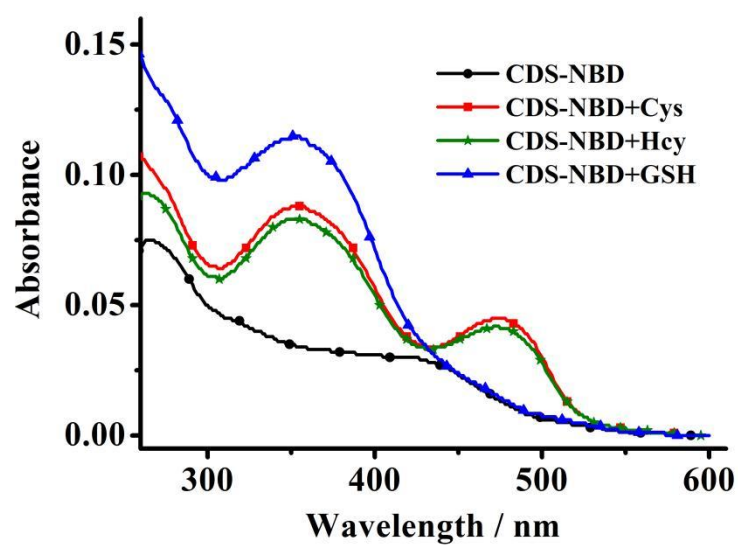

**Figure S1** UV-vis absorption spectra of probe **CDS-NBD** (black) and reacted with Cys (red), Hcy (green) and GSH (blue) in PBS buffer.

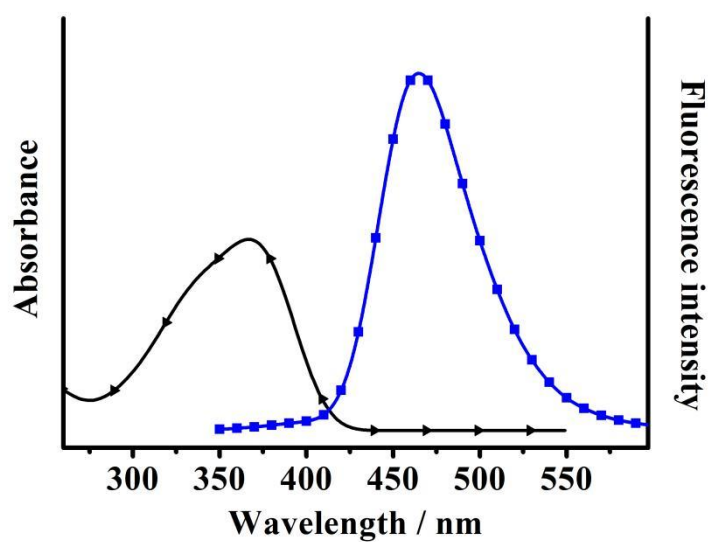

**Figure S2** UV-vis absorption (black) and fluorescence (blue) spectra of **7-HCA** in PBS buffer.

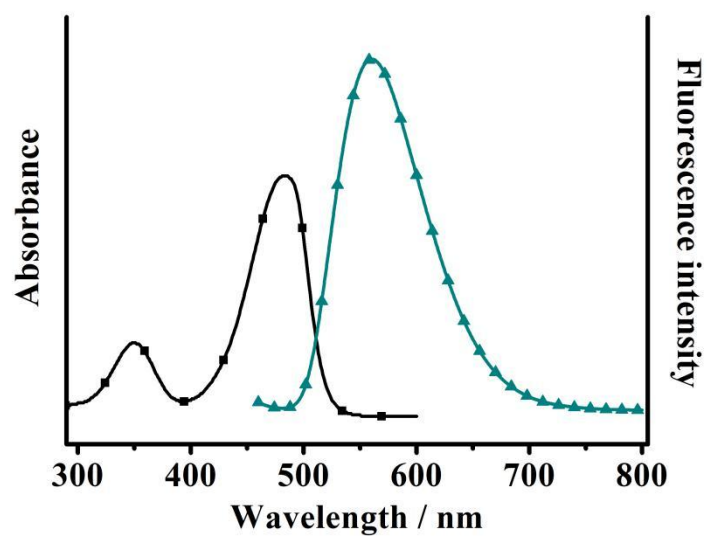

**Figure S3** UV-vis absorption (black) and fluorescence (green) spectra of NBD-N-Bu in PBS buffer.

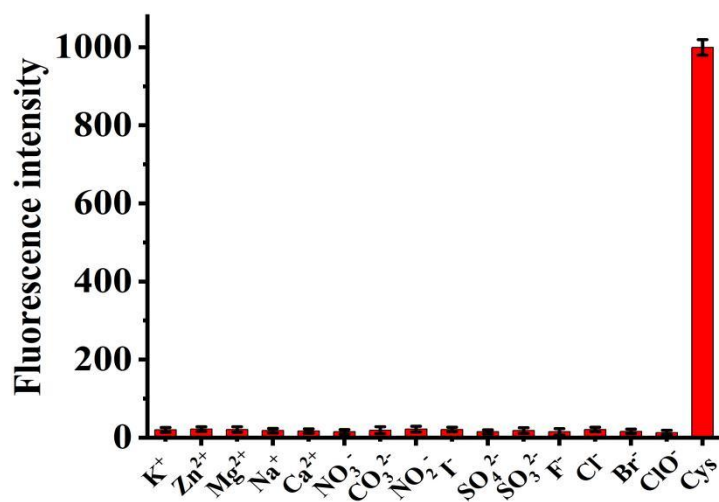

**Figure S4** The change of fluorescence intensity of the probe CDS-NBD in PBS with the addition of 100.00  $\mu\text{M}$  biologically relevant ions at 470 nm of emission.

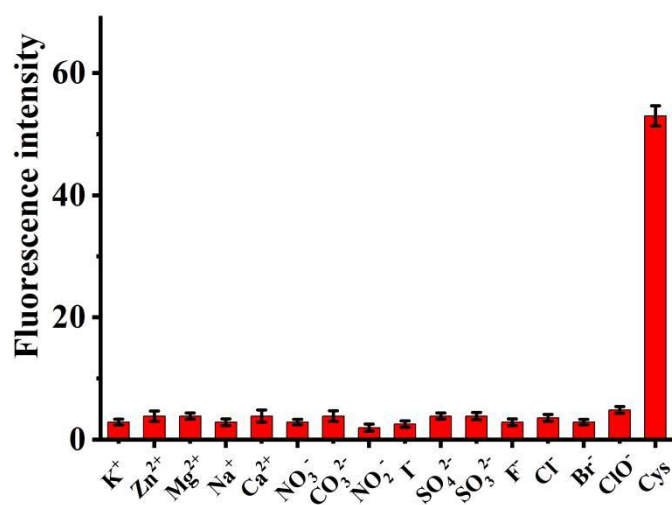

**Figure S5** The change of fluorescence intensity of the probe **CDS-NBD** in PBS with the addition of 100.00  $\mu\text{M}$  biologically relevant ions at 557 nm of emission.

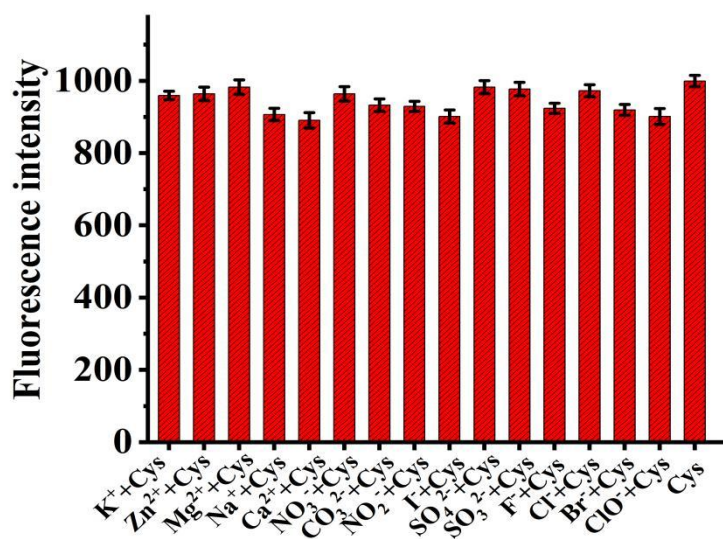

**Figure S6** Fluorescence responses of probe **CDS-NBD** toward Cys in the presence of various coexistence substances (100.00  $\mu\text{M}$ ) at 470 nm of emission.

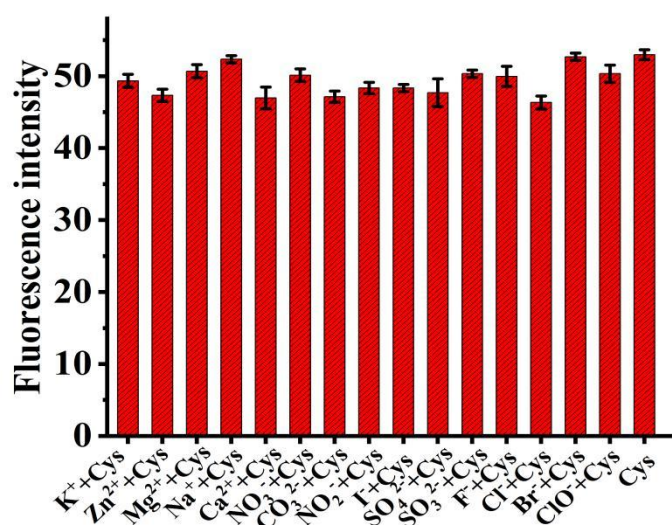

**Figure S7** Fluorescence responses of probe CDS-NBD toward Cys in the present of various coexistence substances (100.00  $\mu\text{M}$ ) at 557 nm of emission.

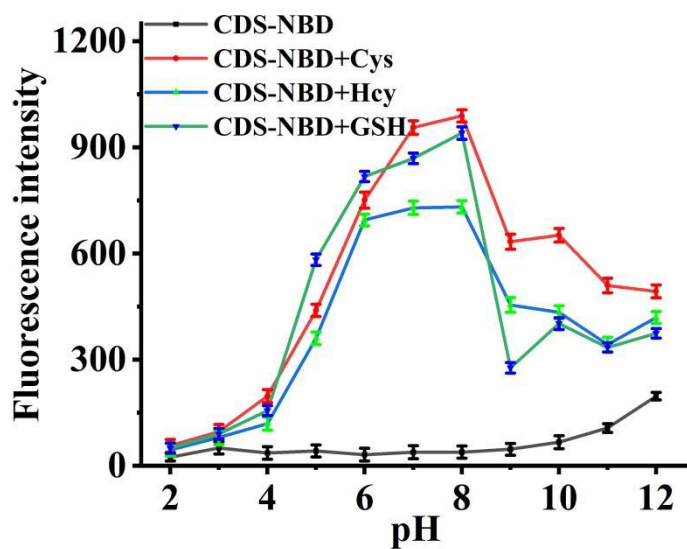

**Figure S8** pH effect on the fluorescence intensity of probe CDS-NBD (10.0  $\mu\text{M}$ ) without (black) and with (60.0  $\mu\text{M}$ ) biothiols (red: Cys, green: Hcy, blue: GSH) at 470 nm.

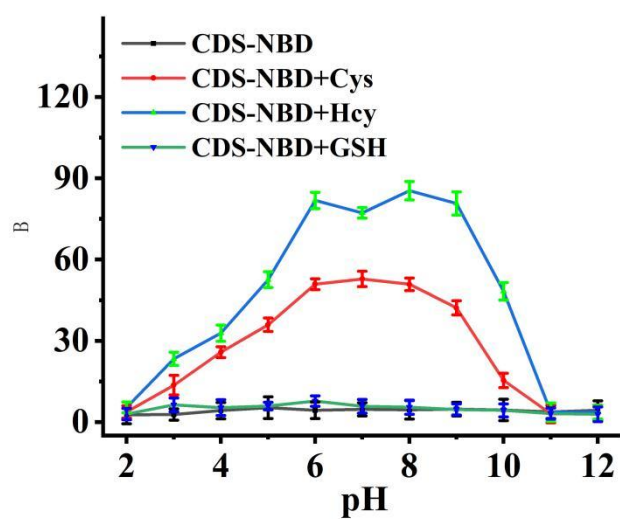

**Figure S9** pH effect on the fluorescence intensity of probe **CDS-NBD** (10.0  $\mu\text{M}$ ) without (blue) and with (60.0  $\mu\text{M}$ ) biothiols (red: Cys, green: Hcy, blue: GSH) at 557 nm.

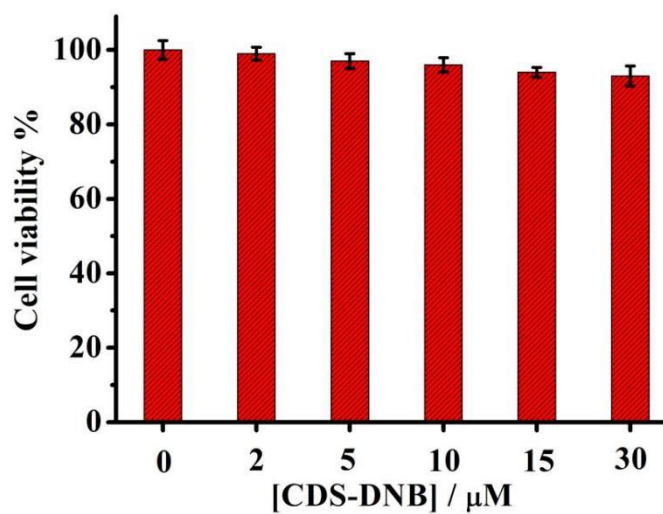

**Figure S10** Percentage of viable HeLa cells after treatment with indicated concentrations of probe **CDS-NBD** after 24 hours.



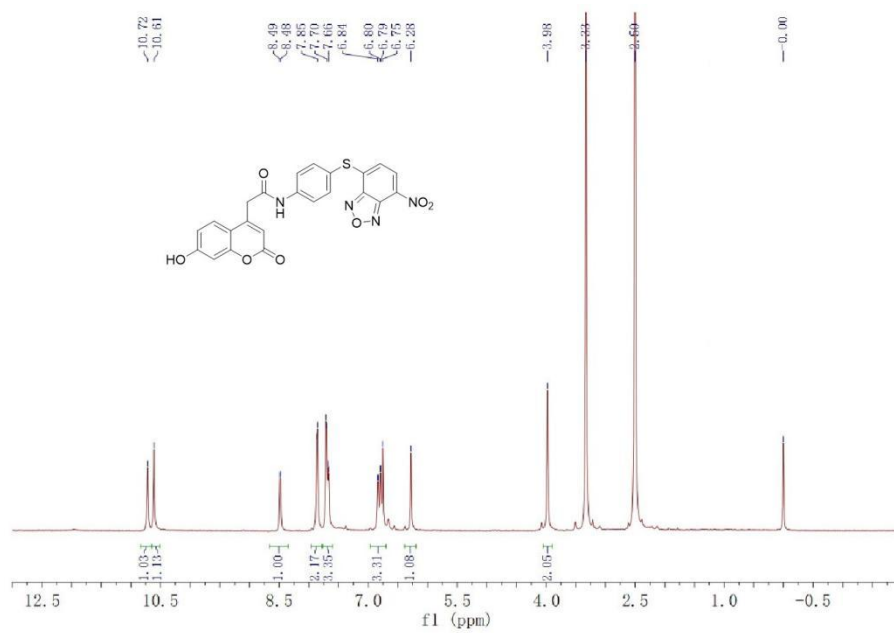

**Figure S11** <sup>1</sup>H NMR spectrum of compound **1** in DMSO-*d*<sub>6</sub>.

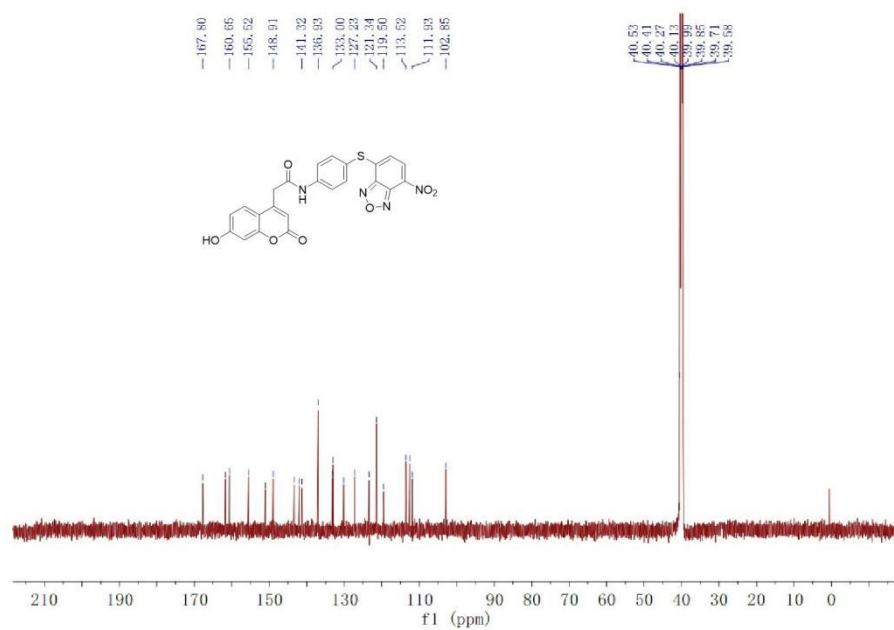

**Figure S12** <sup>13</sup>C NMR spectrum of compound **1** in DMSO-*d*<sub>6</sub>.

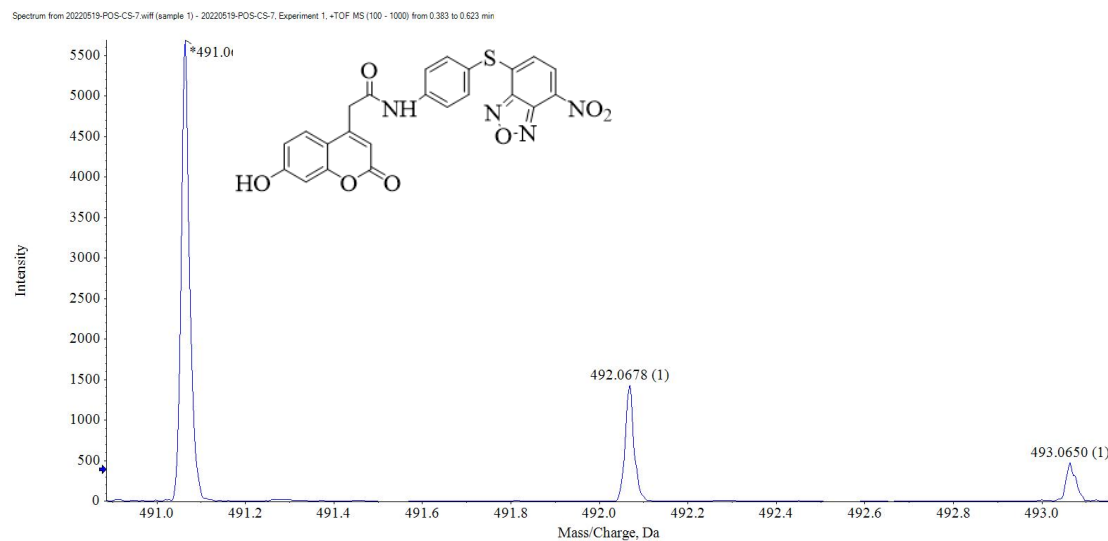

**Figure S13** Mass spectrum of compound 1.

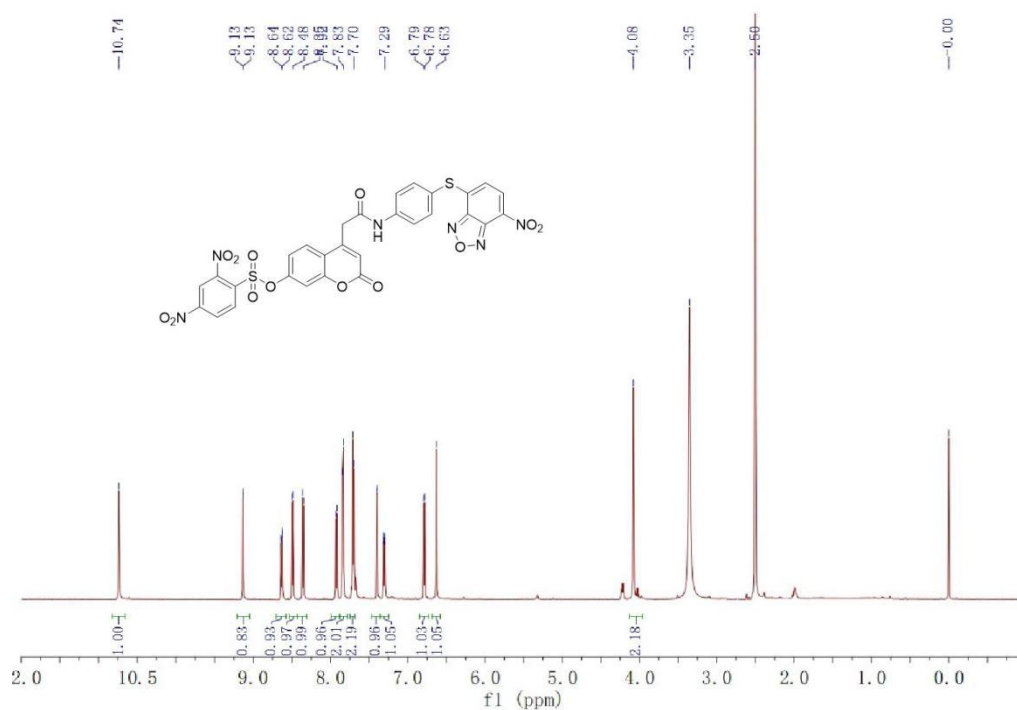

**Figure S14** <sup>1</sup>H NMR spectrum of probe CDS-NBD in DMSO-*d*<sub>6</sub>.

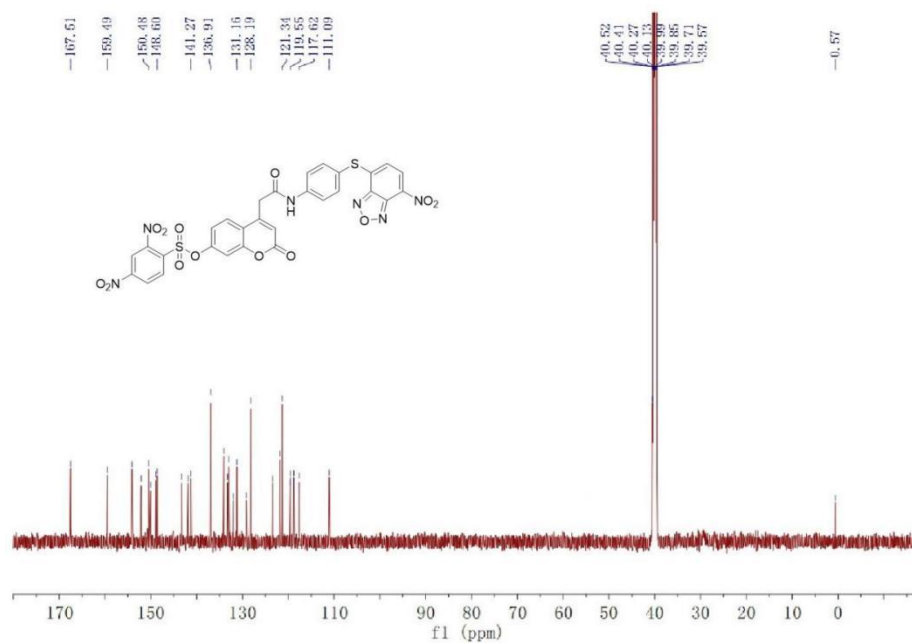

**Figure S15** <sup>13</sup>C NMR spectrum of probe CDS-NBD in DMSO-*d*<sub>6</sub>.

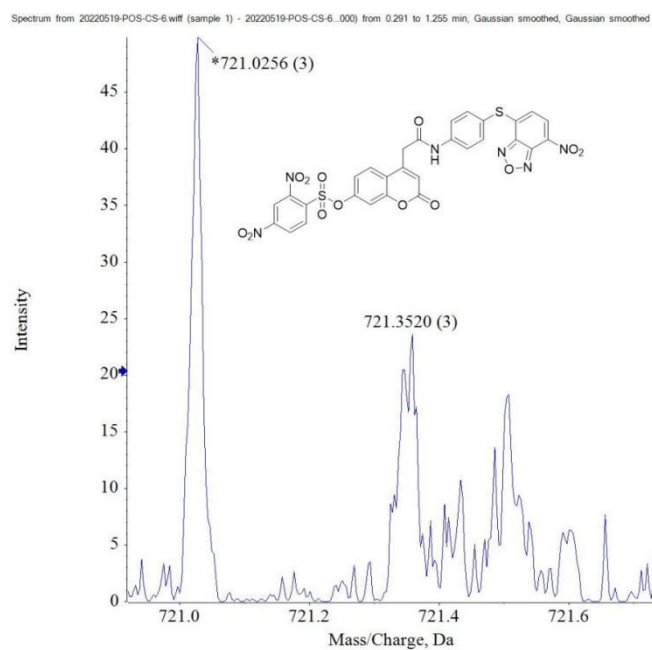

**Figure S16** Mass spectrum of probe CDS-NBD.

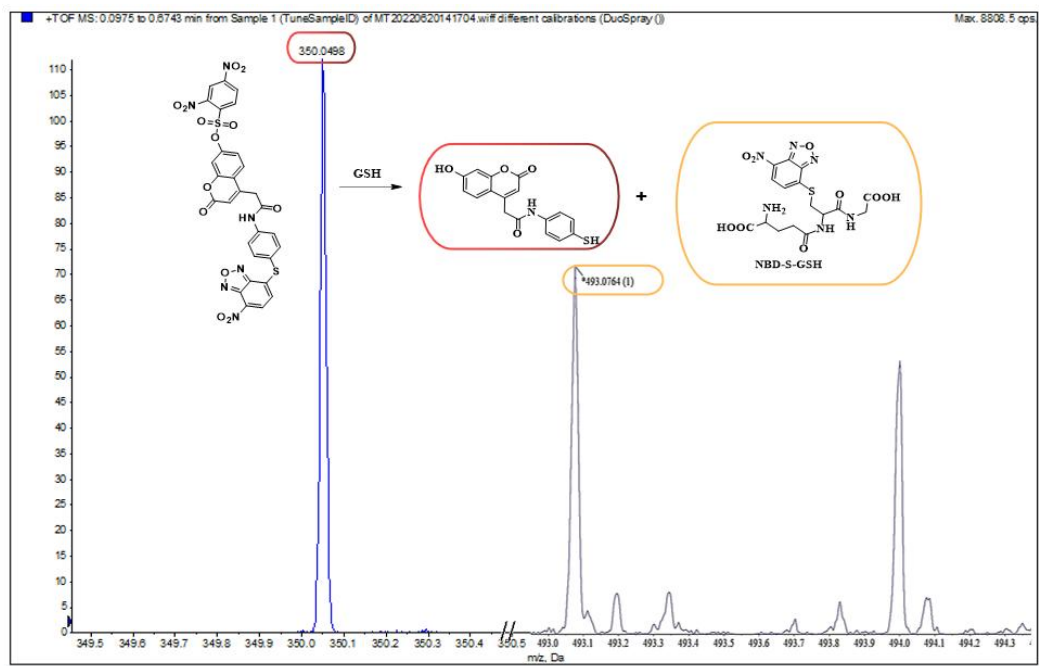

Figure S17 Mass spectrum of probe CDS-NBD with GSH.

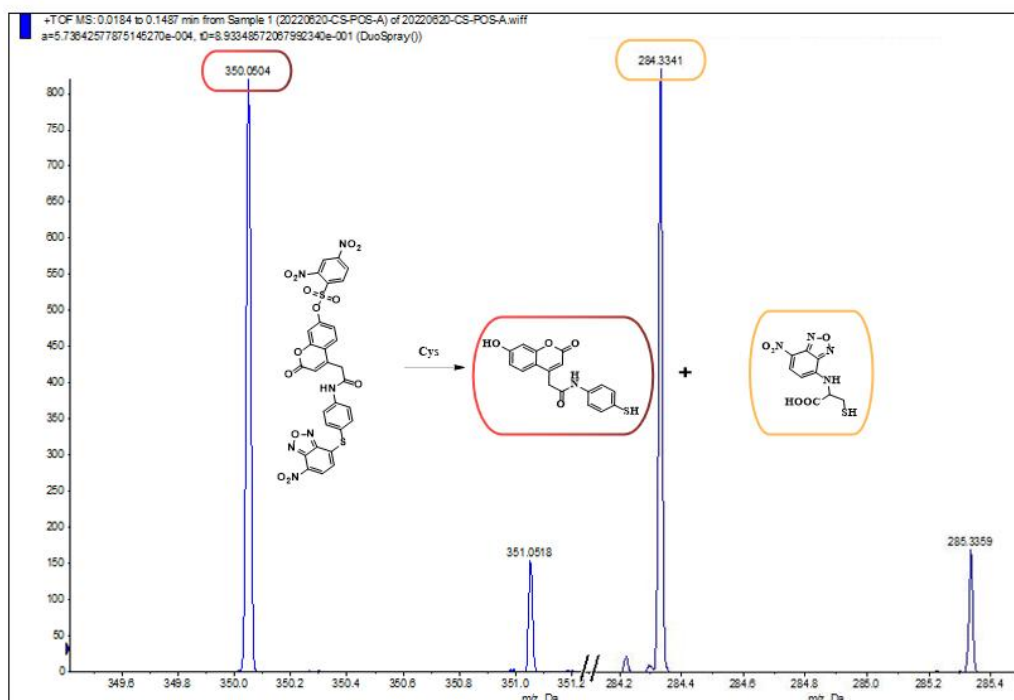

Figure S18 Mass spectrum of probe CDS-NBD with Cys.
